# Supplementary material for: Chirality as a Feature of the Crystal Structure of Lanthanide Ion Complexes—Some Simple Examples
Source: MDPI journal article supplement (doi:10.3390/cryst13020337), 2023-02-16
Supplement: s1 [file s1]

# Chirality as a Feature of the Crystal Structure of Lanthanide Ion Complexes—Some Simple Examples

Lioubov I. Semenova <sup>1</sup>, Irene Ling <sup>2</sup> and Alexandre N. Sobolev <sup>1,\*</sup>

<sup>1</sup> School of Molecular Sciences, M310, The University of Western Australia, 35 Stirling Highway, Perth, WA 6009, Australia

<sup>2</sup> School of Science, Monash University Malaysia, Jalan Lagoon Selatan, Bandar Sunway 47500, Selangor, Malaysia

\* Correspondence: alexandre.sobolev@uwa.edu.au

## SUPPLEMENTARY INFORMATION

### S1. Crystallography details.

Table S1. Crystal and structure refinement data for the redefined Er(bipy)<sub>2</sub>Cl<sub>2</sub>(OH<sub>2</sub>)<sub>2</sub>]Cl·H<sub>2</sub>O structure described in the in reference [24].

| Complex                                                      | 5                                                                                                    |
|--------------------------------------------------------------|------------------------------------------------------------------------------------------------------|
| Empirical formula                                            | C <sub>20</sub> H <sub>20</sub> Cl <sub>3</sub> ErN <sub>4</sub> O <sub>2</sub>                      |
| Formula weight (g mol <sup>-1</sup> )                        | 622.01                                                                                               |
| Crystal system                                               | cubic                                                                                                |
| Space group                                                  | <i>I</i> 23 (No. 197)                                                                                |
| Temperature /K                                               | 297(2)                                                                                               |
| <i>a</i> (Å)                                                 | 25.943(5)                                                                                            |
| <i>b</i> (Å)                                                 | 25.943(5)                                                                                            |
| <i>c</i> (Å)                                                 | 25.943(5)                                                                                            |
| $\alpha$ (°)                                                 | 90                                                                                                   |
| $\beta$ (°)                                                  | 90                                                                                                   |
| $\gamma$ (°)                                                 | 90                                                                                                   |
| <i>V</i> (Å <sup>3</sup> )                                   | 17461(10)                                                                                            |
| <i>Z</i>                                                     | 24                                                                                                   |
| Calculated density (g cm <sup>-3</sup> )                     | 1.420                                                                                                |
| Absorption coefficient (mm <sup>-1</sup> )                   | 3.178                                                                                                |
| <i>F</i> <sub>000</sub>                                      | 7272                                                                                                 |
| Crystal size (mm <sup>3</sup> )                              | 0.30 × 0.30 × 0.15                                                                                   |
| $\theta$ range for data collection (°)                       | 2.483 to 24.973                                                                                      |
| Miller index ranges                                          | -30 $\delta$ <i>h</i> $\delta$ 1, -30 $\delta$ <i>k</i> $\delta$ 0, -30 $\delta$ <i>l</i> $\delta$ 0 |
| Reflections measured                                         | 8395                                                                                                 |
| Independent reflections                                      | 2916                                                                                                 |
| Reflections with <i>I</i> > 2 $\sigma$ ( <i>I</i> )          | 2315                                                                                                 |
| <i>R</i> <sub>int</sub>                                      | 0.0764                                                                                               |
| Data / restraints / parameters                               | 2916 / 87 / 291                                                                                      |
| Final <i>R</i> indices [ <i>I</i> > 2 $\sigma$ ( <i>I</i> )] | <i>R</i> 1 = 0.0475, <i>wR</i> 2 = 0.1204                                                            |
| <i>R</i> indices (all data)                                  | <i>R</i> 1 = 0.0664, <i>wR</i> 2 = 0.1295                                                            |
| Goodness-of-fit on <i>F</i> <sup>2</sup>                     | 1.002                                                                                                |
| $\Delta\rho_{\min}$ (e Å <sup>-3</sup> )                     | -0.502                                                                                               |
| $\Delta\rho_{\max}$ (e Å <sup>-3</sup> )                     | 0.909                                                                                                |
| Absolute structure parameter                                 | 0.31(3)                                                                                              |
| CCDC                                                         | 2220101                                                                                              |

Table S2. Metal atom environment for Dy(bipy)<sub>2</sub>Cl<sub>2</sub>(OH<sub>2</sub>)<sub>2</sub>]Cl·H<sub>2</sub>O, **1**

| Bond length (Å) |           |
|-----------------|-----------|
| Dy1—O1          | 2.323(15) |
| Dy1—O2          | 2.359(19) |
| Dy1—N11'        | 2.545(19) |
| Dy1—N21'        | 2.56(2)   |
| Dy1—N21         | 2.561(18) |
| Dy1—N11         | 2.565(17) |
| Dy1—Cl1         | 2.660(8)  |
| Dy1—Cl2         | 2.686(8)  |
| Bond angles (°) |           |
| O1—Dy1—O2       | 81.4(7)   |
| O1—Dy1—N11'     | 150.4(6)  |
| O2—Dy1—N11'     | 108.9(6)  |
| O1—Dy1—N21'     | 73.0(7)   |
| O2—Dy1—N21'     | 145.5(7)  |
| N11'—Dy1—N21'   | 84.8(6)   |
| O1—Dy1—N21      | 112.2(7)  |
| O2—Dy1—N21      | 149.8(7)  |
| N11'—Dy1—N21    | 73.0(5)   |
| N21'—Dy1—N21    | 63.8(7)   |
| O1—Dy1—N11      | 145.0(7)  |
| O2—Dy1—N11      | 72.5(6)   |
| N11'—Dy1—N11    | 62.9(6)   |
| N21'—Dy1—N11    | 139.4(6)  |
| N21—Dy1—N11     | 82.7(7)   |
| O1—Dy1—Cl1      | 81.5(5)   |
| O2—Dy1—Cl1      | 72.8(5)   |
| N11'—Dy1—Cl1    | 75.7(4)   |
| N21'—Dy1—Cl1    | 80.7(5)   |
| N21—Dy1—Cl1     | 134.0(5)  |
| N11—Dy1—Cl1     | 111.4(4)  |
| O1—Dy1—Cl2      | 73.5(5)   |
| O2—Dy1—Cl2      | 83.9(5)   |
| N11'—Dy1—Cl2    | 133.9(4)  |
| N21'—Dy1—Cl2    | 109.7(5)  |
| N21—Dy1—Cl2     | 75.1(5)   |
| N11—Dy1—Cl2     | 80.8(5)   |
| Cl1—Dy1—Cl2     | 148.1(2)  |
| C12'—N11'—Dy1   | 119.7(13) |
| C16'—N11'—Dy1   | 118.4(13) |

Table S3. Metal atom environment for La<sub>2</sub>(phen)<sub>2</sub>(O<sub>2</sub>CCH<sub>3</sub>)<sub>4</sub>(NO<sub>3</sub>)<sub>2</sub>, **2**

| Bond length (Å)                        |           |
|----------------------------------------|-----------|
| La1—O21                                | 2.428(13) |
| La1—O31                                | 2.436(15) |
| La1—O22 <sup>i</sup>                   | 2.481(12) |
| La1—O11                                | 2.559(13) |
| La1—O32 <sup>i</sup>                   | 2.570(13) |
| La1—O12                                | 2.611(13) |
| La1—N11'                               | 2.681(14) |
| La1—N11                                | 2.690(14) |
| La1—O31 <sup>i</sup>                   | 2.758(12) |
| La1—N1                                 | 2.98(2)   |
| La1—C3 <sup>i</sup>                    | 3.00(2)   |
| La1—La1 <sup>i</sup>                   | 4.060(4)  |
| Bond angle (°)                         |           |
| O21—La1—O31                            | 75.3(5)   |
| O21—La1—O22 <sup>i</sup>               | 134.9(4)  |
| O31—La1—O22 <sup>i</sup>               | 75.6(5)   |
| O21—La1—O11                            | 130.9(5)  |
| O31—La1—O11                            | 84.0(5)   |
| O22 <sup>i</sup> —La1—O11              | 78.6(5)   |
| O21—La1—O32 <sup>i</sup>               | 84.8(5)   |
| O31—La1—O32 <sup>i</sup>               | 126.1(4)  |
| O22 <sup>i</sup> —La1—O32 <sup>i</sup> | 85.3(5)   |
| O11—La1—O32 <sup>i</sup>               | 140.9(5)  |
| O21—La1—O12                            | 82.9(4)   |
| O31—La1—O12                            | 82.2(5)   |
| O22 <sup>i</sup> —La1—O12              | 125.8(5)  |
| O11—La1—O12                            | 50.1(4)   |
| O32 <sup>i</sup> —La1—O12              | 144.7(5)  |
| O21—La1—N11'                           | 78.5(4)   |
| O31—La1—N11'                           | 144.6(4)  |
| O22 <sup>i</sup> —La1—N11'             | 139.3(4)  |
| O11—La1—N11'                           | 95.8(5)   |
| O32 <sup>i</sup> —La1—N11'             | 73.9(4)   |
| O12—La1—N11'                           | 71.3(4)   |
| O21—La1—N11                            | 136.3(4)  |
| O31—La1—N11                            | 148.2(4)  |
| O22 <sup>i</sup> —La1—N11              | 79.8(4)   |
| O11—La1—N11                            | 71.5(5)   |
| O32 <sup>i</sup> —La1—N11              | 70.7(4)   |
| O12—La1—N11                            | 96.5(5)   |
| N11'—La1—N11                           | 60.5(4)   |
| O21—La1—O31 <sup>i</sup>               | 69.5(4)   |
| O31—La1—O31 <sup>i</sup>               | 77.4(5)   |
| O22 <sup>i</sup> —La1—O31 <sup>i</sup> | 71.0(4)   |
| O11—La1—O31 <sup>i</sup>               | 147.4(4)  |
| O32 <sup>i</sup> —La1—O31 <sup>i</sup> | 48.7(4)   |
| O12—La1—O31 <sup>i</sup>               | 149.0(5)  |
| N11'—La1—O31 <sup>i</sup>              | 114.9(4)  |
| N11—La1—O31 <sup>i</sup>               | 113.1(5)  |
| O21—La1—N1                             | 106.8(5)  |
| O31—La1—N1                             | 83.2(5)   |
| O22 <sup>i</sup> —La1—N1               | 103.0(5)  |

|                                       |          |
|---------------------------------------|----------|
| O11—La1—N1                            | 25.5(5)  |
| O32 <sup>i</sup> —La1—N1              | 150.7(5) |
| O12—La1—N1                            | 24.6(5)  |
| N11'—La1—N1                           | 82.1(5)  |
| N11—La1—N1                            | 83.1(5)  |
| O31 <sup>i</sup> —La1—N1              | 160.5(5) |
| O21—La1—C3 <sup>i</sup>               | 76.1(5)  |
| O31—La1—C3 <sup>i</sup>               | 101.6(5) |
| O22 <sup>i</sup> —La1—C3 <sup>i</sup> | 77.0(5)  |
| O11—La1—C3 <sup>i</sup>               | 152.6(5) |
| O32 <sup>i</sup> —La1—C3 <sup>i</sup> | 24.5(4)  |
| O12—La1—C3 <sup>i</sup>               | 156.8(5) |
| O21—La1—O31                           | 75.3(5)  |
| O21—La1—O22 <sup>i</sup>              | 134.9(4) |

Symmetry code: (i)  $-x+1, -y+1, -z+1$ .

Table S4. Metal atom environment for Lu(terpy)(O<sub>2</sub>CCH<sub>3</sub>)<sub>3</sub>]·NaNO<sub>3</sub>, **3**

| Bond length (Å)                        |           |
|----------------------------------------|-----------|
| Lu1—O1                                 | 2.291(16) |
| Lu1—O1 <sup>mi</sup>                   | 2.336(16) |
| Lu1—O2                                 | 2.445(16) |
| Lu1—N21'                               | 2.474(17) |
| Lu1—N21                                | 2.492(15) |
| Lu1—O2 <sup>ni</sup>                   | 2.503(15) |
| Lu1—N11                                | 2.529(17) |
| Lu1—C1 <sup>mi</sup>                   | 2.81(2)   |
| Bond angle (°)                         |           |
| O1'—Lu1—O2 <sup>ni</sup>               | 82.0(5)   |
| O1'—Lu1—O1                             | 130.4(6)  |
| O2 <sup>ni</sup> —Lu1—O1               | 84.5(6)   |
| O1'—Lu1—O1 <sup>mi</sup>               | 81.5(6)   |
| O2 <sup>ni</sup> —Lu1—O1 <sup>mi</sup> | 125.4(6)  |
| O1—Lu1—O1 <sup>mi</sup>                | 141.8(5)  |
| O1'—Lu1—O2                             | 75.9(6)   |
| O2 <sup>ni</sup> —Lu1—O2               | 76.6(5)   |
| O1—Lu1—O2                              | 54.5(5)   |
| O1 <sup>mi</sup> —Lu1—O2               | 145.8(5)  |
| O1'—Lu1—N21'                           | 147.8(6)  |
| O2 <sup>ni</sup> —Lu1—N21'             | 80.8(6)   |
| O1—Lu1—N21'                            | 74.6(6)   |
| O1 <sup>mi</sup> —Lu1—N21'             | 86.6(6)   |
| O2—Lu1—N21'                            | 125.5(6)  |
| O1'—Lu1—N21                            | 77.5(5)   |
| O2 <sup>ni</sup> —Lu1—N21              | 145.8(6)  |
| O1'—Lu1—O2 <sup>ni</sup>               | 82.0(5)   |
| O1'—Lu1—O1                             | 130.4(6)  |
| O2 <sup>ni</sup> —Lu1—O1               | 84.5(6)   |
| O1'—Lu1—O1 <sup>mi</sup>               | 81.5(6)   |
| O2 <sup>ni</sup> —Lu1—O1 <sup>mi</sup> | 125.4(6)  |
| O1—Lu1—O1 <sup>mi</sup>                | 141.8(5)  |
| O1'—Lu1—O2                             | 75.9(6)   |
| O2 <sup>ni</sup> —Lu1—O2               | 76.6(5)   |
| O1—Lu1—O2                              | 54.5(5)   |
| O1 <sup>mi</sup> —Lu1—O2               | 145.8(5)  |
| O1'—Lu1—N21'                           | 147.8(6)  |

|                                          |           |
|------------------------------------------|-----------|
| C12'—N11'—Dy1                            | 119.7(13) |
| C16'—N11'—Dy1                            | 118.4(13) |
| O1'—Lu1—O2 <sup>ii</sup>                 | 82.0(5)   |
| O1'—Lu1—O1                               | 130.4(6)  |
| O2 <sup>ii</sup> —Lu1—O1                 | 84.5(6)   |
| O1'—Lu1—O1 <sup>iii</sup>                | 81.5(6)   |
| O2 <sup>ii</sup> —Lu1—O1 <sup>iii</sup>  | 125.4(6)  |
| O1—Lu1—O1 <sup>iii</sup>                 | 141.8(5)  |
| O1'—Lu1—O2                               | 75.9(6)   |
| O2 <sup>ii</sup> —Lu1—O2                 | 76.6(5)   |
| O1—Lu1—O2                                | 54.5(5)   |
| O1 <sup>iii</sup> —Lu1—O2                | 145.8(5)  |
| O1'—Lu1—N21'                             | 147.8(6)  |
| O2 <sup>ii</sup> —Lu1—N21'               | 80.8(6)   |
| O1—Lu1—N21'                              | 74.6(6)   |
| O1 <sup>iii</sup> —Lu1—N21'              | 86.6(6)   |
| O2—Lu1—N21'                              | 125.5(6)  |
| O1'—Lu1—N21                              | 77.5(5)   |
| O2 <sup>ii</sup> —Lu1—N21                | 145.8(6)  |
| O1—Lu1—N21                               | 88.3(6)   |
| O1 <sup>iii</sup> —Lu1—N21               | 78.2(5)   |
| O2—Lu1—N21                               | 72.1(5)   |
| N21'—Lu1—N21                             | 129.1(5)  |
| O1'—Lu1—O2 <sup>iii</sup>                | 76.0(5)   |
| O2 <sup>ii</sup> —Lu1—O2 <sup>iii</sup>  | 72.5(6)   |
| O1—Lu1—O2 <sup>iii</sup>                 | 142.6(5)  |
| O1 <sup>iii</sup> —Lu1—O2 <sup>iii</sup> | 53.0(5)   |
| O2—Lu1—O2 <sup>iii</sup>                 | 140.5(5)  |
| N21'—Lu1—O2 <sup>iii</sup>               | 72.9(5)   |
| N21—Lu1—O2 <sup>iii</sup>                | 127.0(6)  |
| O1'—Lu1—N11                              | 136.2(5)  |
| O2 <sup>ii</sup> —Lu1—N11                | 141.8(5)  |
| O1—Lu1—N11                               | 70.6(6)   |
| O1 <sup>iii</sup> —Lu1—N11               | 71.4(6)   |
| O2—Lu1—N11                               | 108.7(6)  |
| N21'—Lu1—N11                             | 65.2(5)   |
| N21—Lu1—N11                              | 63.9(5)   |
| O2 <sup>iii</sup> —Lu1—N11               | 110.7(6)  |
| O1'—Lu1—C1 <sup>iii</sup>                | 76.2(6)   |
| O2 <sup>ii</sup> —Lu1—C1 <sup>iii</sup>  | 99.4(6)   |
| O1—Lu1—C1 <sup>iii</sup>                 | 153.3(6)  |
| O1 <sup>iii</sup> —Lu1—C1 <sup>iii</sup> | 26.1(5)   |
| O2—Lu1—C1 <sup>iii</sup>                 | 152.1(6)  |
| N21'—Lu1—C1 <sup>iii</sup>               | 80.0(6)   |
| N21—Lu1—C1 <sup>iii</sup>                | 101.9(6)  |
| O2 <sup>iii</sup> —Lu1—C1 <sup>iii</sup> | 27.1(5)   |
| N11—Lu1—C1 <sup>iii</sup>                | 91.6(6)   |
| O1'—Lu1—C1                               | 103.0(7)  |
| O2 <sup>ii</sup> —Lu1—C1                 | 79.0(6)   |
| O1—Lu1—C1                                | 27.4(6)   |
| O1 <sup>iii</sup> —Lu1—C1                | 155.6(5)  |
| O2—Lu1—C1                                | 27.1(6)   |
| N21'—Lu1—C1                              | 100.2(7)  |
| N21—Lu1—C1                               | 79.4(6)   |
| O2 <sup>iii</sup> —Lu1—C1                | 151.4(5)  |
| N11—Lu1—C1                               | 90.0(7)   |
| C1 <sup>iii</sup> —Lu1—C1                | 178.3(7)  |
| O1'—Lu1—Na1 <sup>i</sup>                 | 72.2(4)   |
| O2 <sup>ii</sup> —Lu1—Na1 <sup>i</sup>   | 41.7(5)   |
| O1—Lu1—Na1 <sup>i</sup>                  | 122.2(4)  |
| O1 <sup>iii</sup> —Lu1—Na1 <sup>i</sup>  | 83.7(4)   |
| O2—Lu1—Na1 <sup>i</sup>                  | 112.6(4)  |
| N21'—Lu1—Na1 <sup>i</sup>                | 76.8(4)   |
| N21—Lu1—Na1 <sup>i</sup>                 | 146.6(4)  |

|                                         |          |
|-----------------------------------------|----------|
| O2 <sup>iii</sup> —Lu1—Na1 <sup>i</sup> | 31.2(4)  |
| N11—Lu1—Na1 <sup>i</sup>                | 135.1(4) |
| C1 <sup>iii</sup> —Lu1—Na1 <sup>i</sup> | 57.7(5)  |
| C1—Lu1—Na1 <sup>i</sup>                 | 120.6(4) |

Symmetry codes: (i)  $-x+1, -y+1, -z+1$ .

Table S5. Metal atom environment for Lu(phen)(O<sub>2</sub>CH)<sub>3</sub>(OH<sub>2</sub>)]·H<sub>2</sub>O, **4**

| Bond length (Å)                         |            |
|-----------------------------------------|------------|
| Lu1—O31                                 | 2.210(8)   |
| Lu1—O22 <sup>i</sup>                    | 2.299(7)   |
| Lu1—O21                                 | 2.311(7)   |
| Lu1—O11                                 | 2.314(4)   |
| Lu1—O11 <sup>ii</sup>                   | 2.314(4)   |
| Lu1—O1 <sup>ii</sup>                    | 2.378(8)   |
| Lu1—O1                                  | 2.378(8)   |
| Lu1—N1                                  | 2.494(7)   |
| Bond angle (°)                          |            |
| O31—Lu1—O21                             | 87.7(3)    |
| O22 <sup>i</sup> —Lu1—O21               | 43.8(3)    |
| O31—Lu1—O11                             | 77.1(3)    |
| O22 <sup>i</sup> —Lu1—O11               | 75.0(2)    |
| O21—Lu1—O11                             | 74.6(2)    |
| O31—Lu1—O11 <sup>ii</sup>               | 108.3(3)   |
| O22 <sup>i</sup> —Lu1—O11 <sup>ii</sup> | 120.3(2)   |
| O21—Lu1—O11 <sup>ii</sup>               | 142.0(2)   |
| O11—Lu1—O11 <sup>ii</sup>               | 141.67(19) |
| O11—Lu1—O1 <sup>ii</sup>                | 78.9(2)    |
| O11 <sup>ii</sup> —Lu1—O1 <sup>ii</sup> | 136.5(2)   |
| O11—Lu1—O1                              | 136.5(2)   |
| O11 <sup>ii</sup> —Lu1—O1               | 78.9(2)    |
| O1 <sup>ii</sup> —Lu1—O1                | 58.1(4)    |
| O31—Lu1—N1                              | 76.6(3)    |
| O22 <sup>i</sup> —Lu1—N1                | 131.3(2)   |
| O21—Lu1—N1                              | 145.7(2)   |
| O11—Lu1—N1                              | 72.3(1)    |
| O11 <sup>ii</sup> —Lu1—N1               | 72.3(1)    |
| O1 <sup>ii</sup> —Lu1—N1                | 129.0(2)   |
| O1—Lu1—N1                               | 129.0(2)   |
| O31—Lu1—N1'                             | 139.0(3)   |
| O22 <sup>i</sup> —Lu1—N1'               | 72.0(2)    |
| O21—Lu1—N1'                             | 114.1(2)   |
| O11—Lu1—N1'                             | 76.30(11)  |
| O11 <sup>ii</sup> —Lu1—N1'              | 76.30(11)  |
| O1 <sup>ii</sup> —Lu1—N1'               | 144.1(2)   |
| O1—Lu1—N1'                              | 144.1(2)   |
| N1—Lu1—N1'                              | 66.0(2)    |

Symmetry codes: (i)  $-x, -y, -z$ ; (ii)  $x, -y+1/2, z$ .

## S2. Details of atom numbering in each complex.

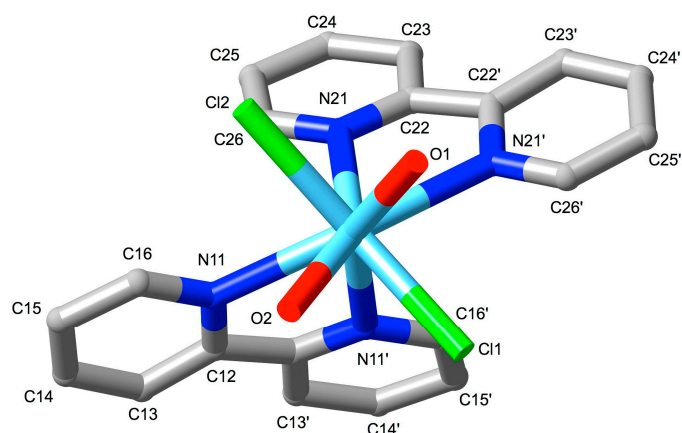

Figure S1. Complex 1

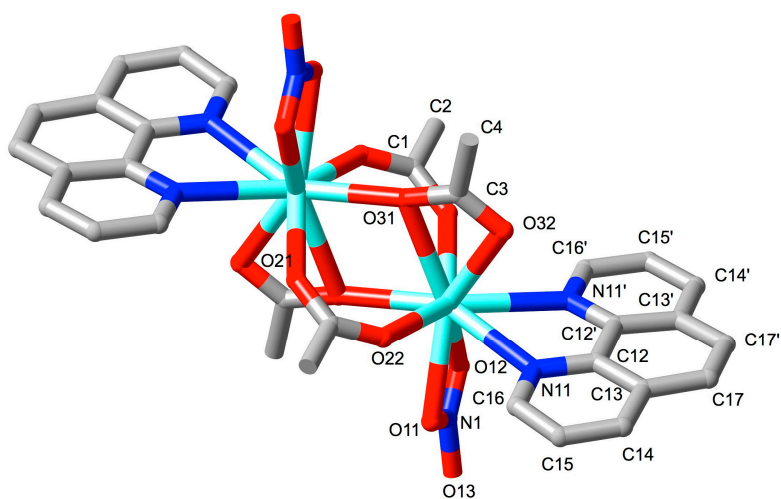

Figure S2. Complex 2 (centrosymmetric dimer)

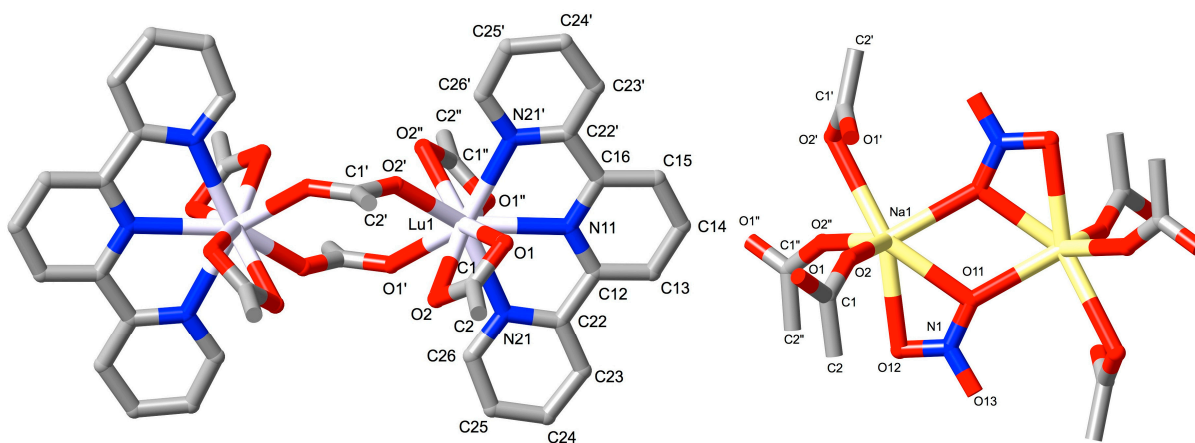

Figure S3. Complex 3 (two centrosymmetric components of a polymer)

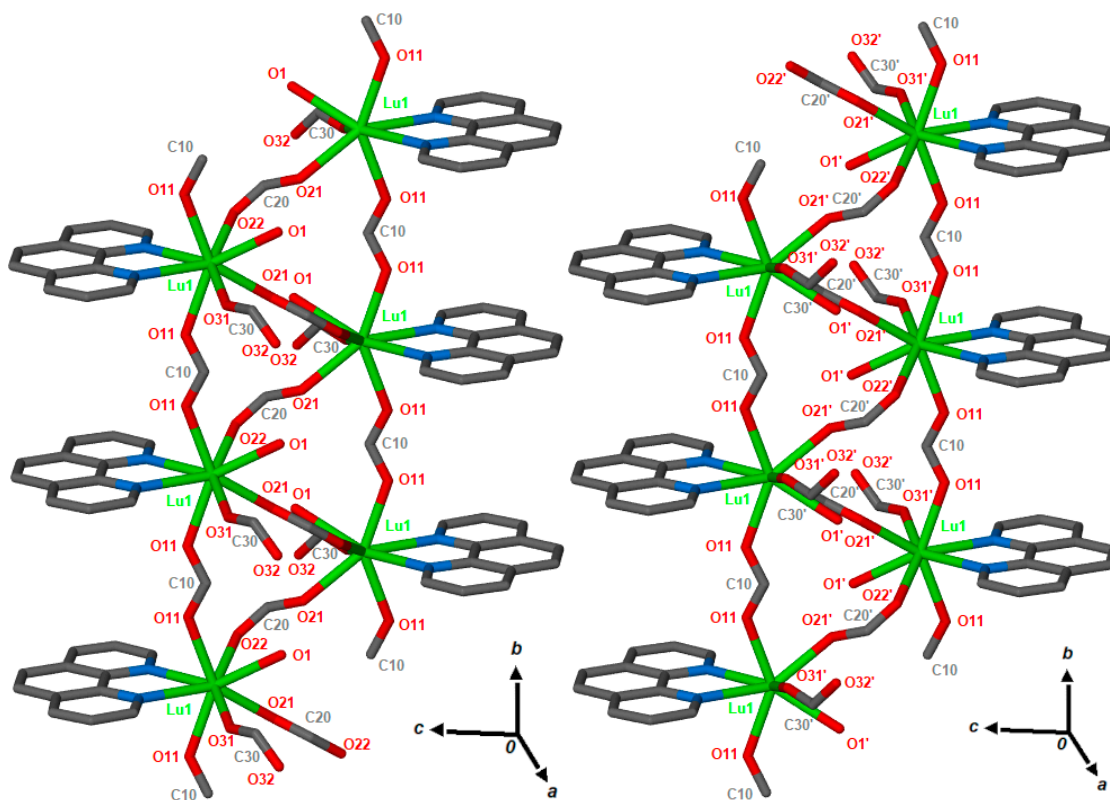

**Figure S4.** Complex 4 (two mirror-image helical polymer components)

### **S3. Two-dimensional fingerprint plots generated from the Hirshfeld surfaces, using CrystalExplorer17.**

The two-dimensional fingerprint plots for all complexes revealed that the H...H contacts have significant contribution to the total Hirshfeld surfaces and are responsible for the overall stabilization of the crystals, scattered points are reflected homogeneously over a large range of ( $d_i$ ,  $d_e$ ) pairs. Significant H...Cl/Cl...H interactions in complex 1 can be seen, indicated by the two symmetrical narrow spikes at the top left and the bottom right in the two-dimensional fingerprint plots. The H...O/O...H and H...C/C...H contacts constitute important interactions in both complexes 2 and 3 with the scattered points distributed evenly in the two-dimensional fingerprint plots. The presence of stacking interactions in the crystal packing for all complexes was found in smaller percentages contributing to the total interaction surface.



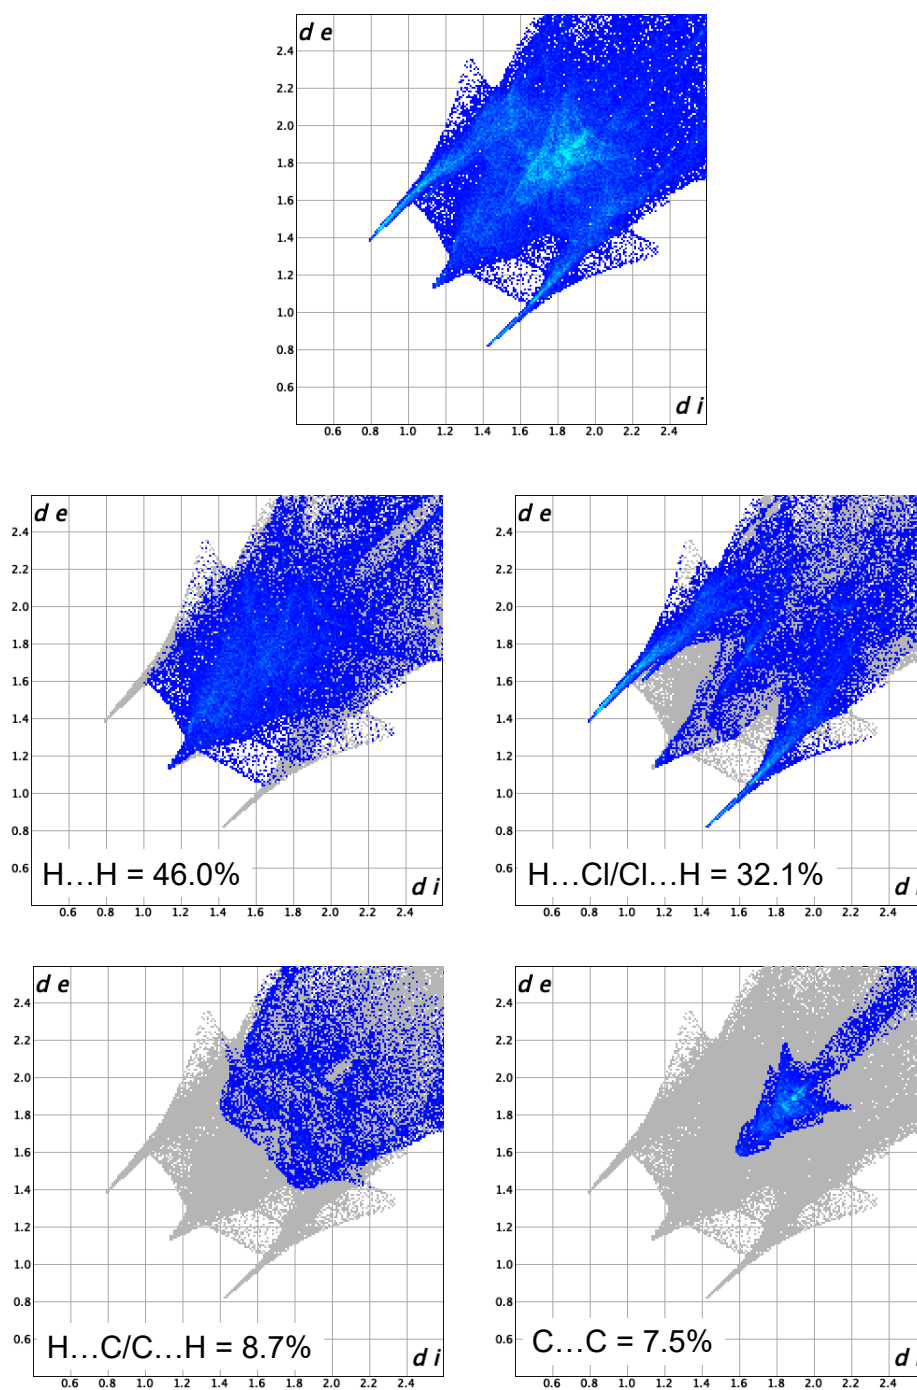

**Figure S5.** Two-dimensional fingerprint plots for complex **1** showing total interactions (top) and the selected key individual interatomic contacts with the percentages of contribution to the total interaction.

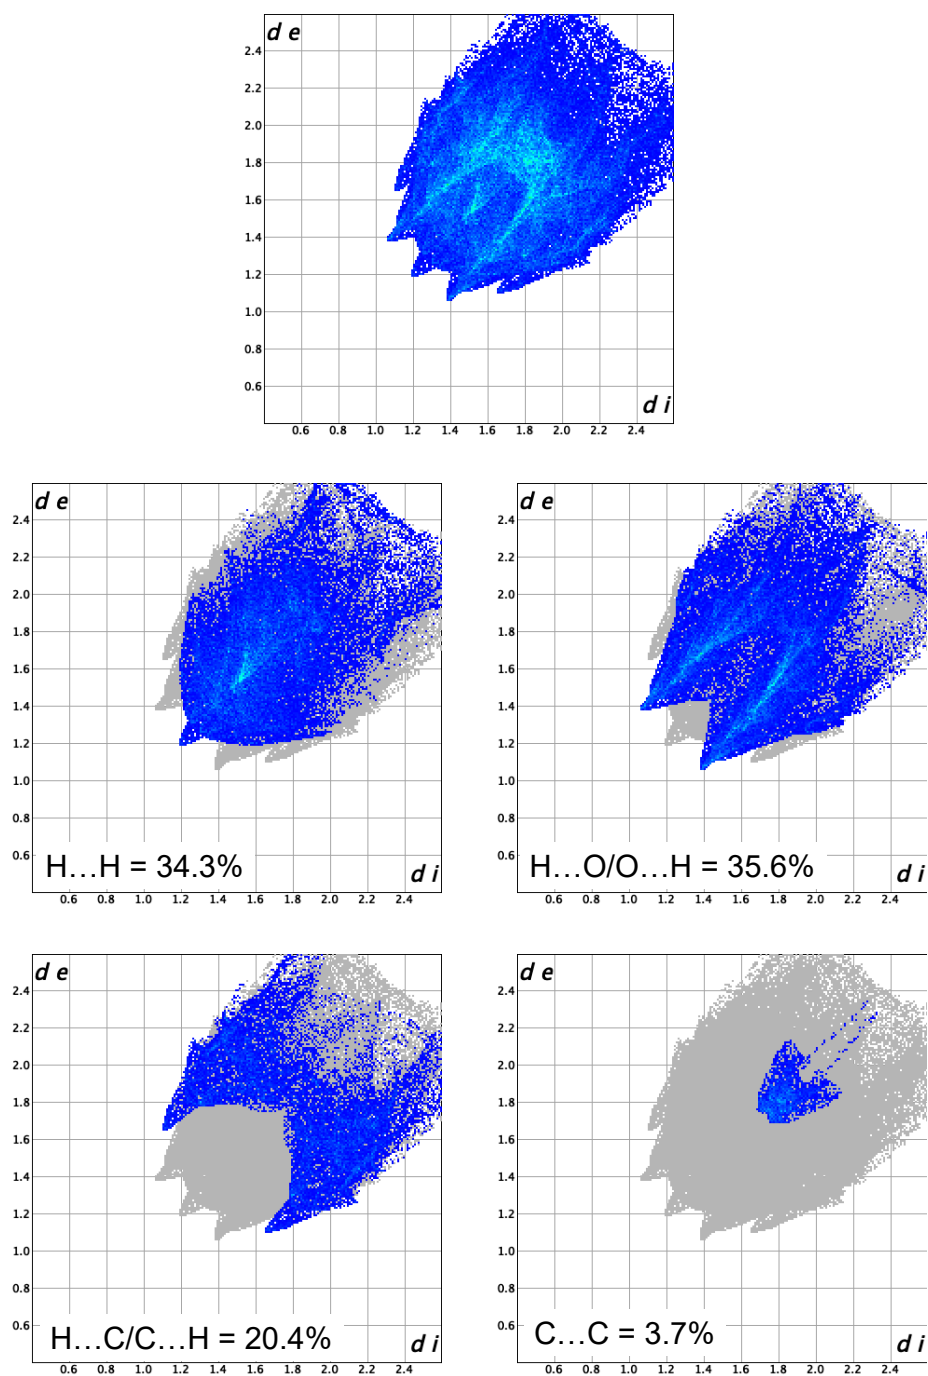

**Figure S6.** Two-dimensional fingerprint plots for complex **2** showing total interactions (top) and the selected key individual interatomic contacts with the percentages of contribution to the total interaction.

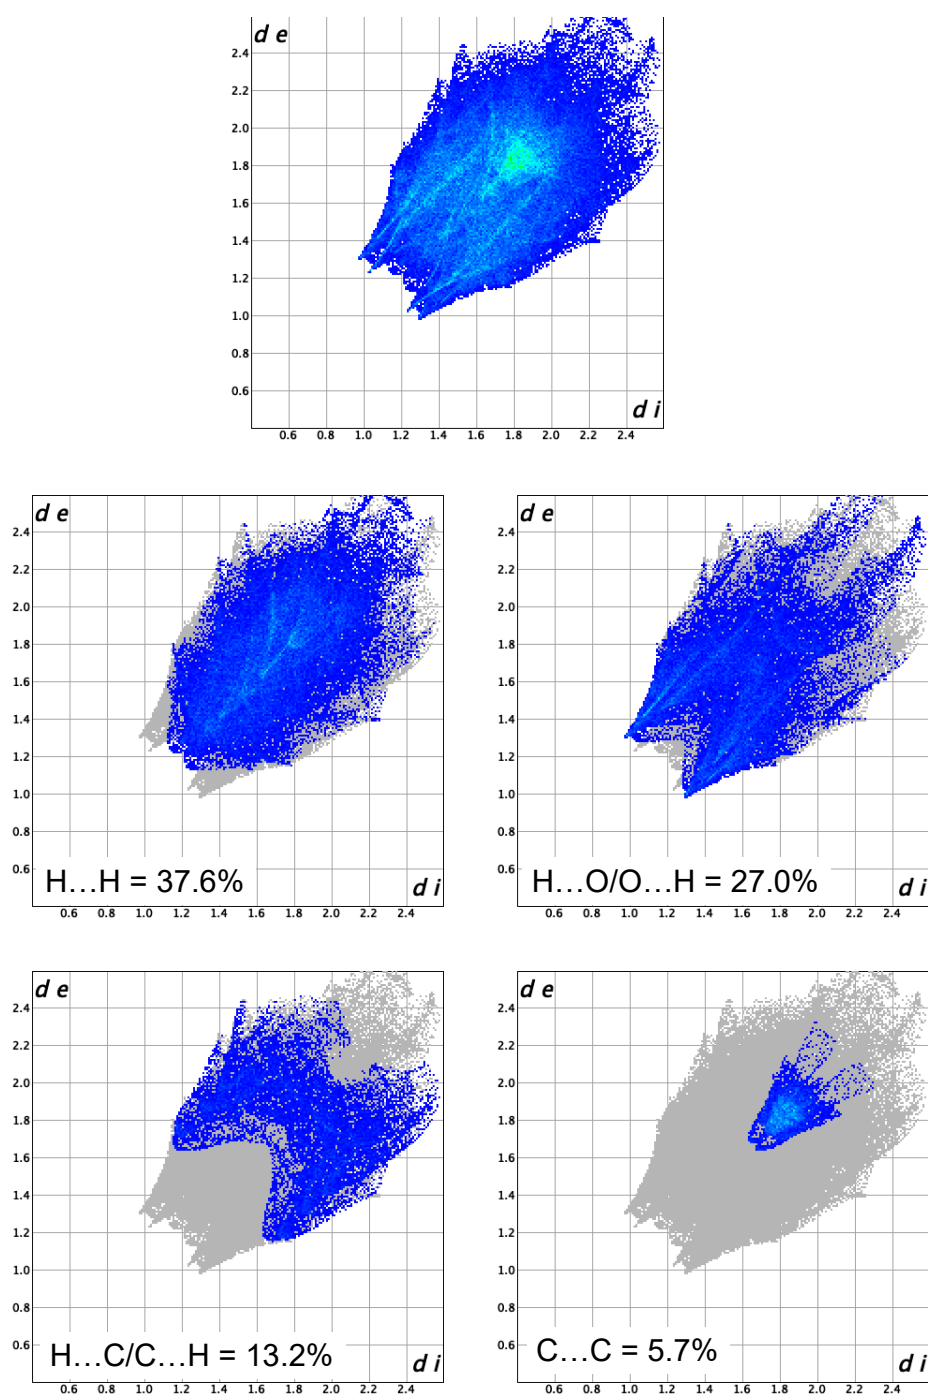

**Figure S7.** Two-dimensional fingerprint plots for complex **3** showing total interactions (top) and the selected key individual interatomic contacts with the percentages of contribution to the total interaction.

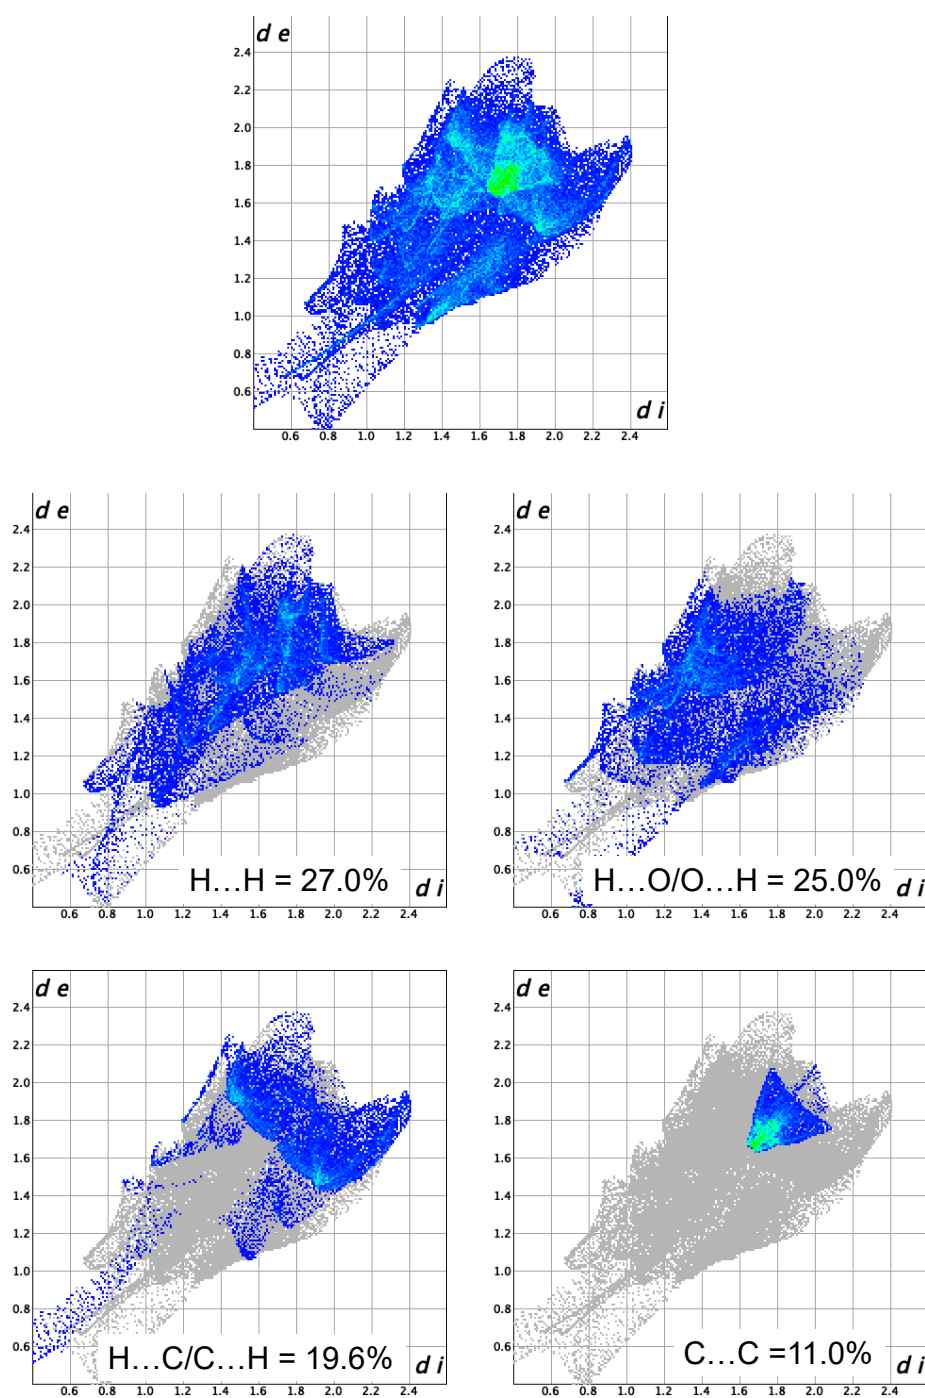

**Figure S8.** Two-dimensional fingerprint plots for complex **4** showing total interactions (top) and the selected key individual interatomic contacts with the percentages of contribution to the total interaction.
